# Supplementary material
Source: Royal Society of Chemistry journal article supplement (doi:10.1039/d6ee00197a)
Supplement: d6ee00197a1.pdf [file d6ee00197a1.pdf]

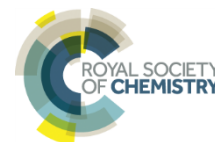

## Electronic Supplementary Information (ESI)

### Localized anion-rich solvation structure in low-concentration electrolytes enabled by non-coordinating chaotrope for deep-cycling zinc metal batteries

Licheng Miao,<sup>‡a</sup> Guoqiang Ma,<sup>‡b,d</sup> Kaiyue Qiu,<sup>b</sup> Zhiyuan Zhao,<sup>a</sup> Minglu Li,<sup>c</sup> Tongqiang Bi,<sup>b</sup> Kai Yang,<sup>a</sup> Yuanyuan Hu,<sup>a</sup> Yuanyuan Wang,<sup>b</sup> Jing Xu,<sup>a</sup> Lei Ma,<sup>\*c</sup> Zhaoxi Shen,<sup>\*b</sup> and Ning Zhang<sup>\*b,c</sup>

- a. College of Chemistry and Material Science, Shandong Agriculture University, Taian 271018, China.
- b. College of Chemistry and Materials Science, Hebei University, Baoding 071002, China. E-mail: ningzhang@hbu.edu.cn; zhaoxishen@hbu.edu.cn.
- c. Shijiazhuang Shangtai Technology Co., Ltd., Shijiazhuang 050000, China. E-mail: mle617@163.com
- d. College of Chemical and Pharmaceutical Engineering, Hebei University of Science and Technology, Shijiazhuang 050018, China

## Experimental Section

### Preparation of electrolytes and cathodes

**Electrolytes:** All aqueous electrolytes were prepared using deionized water from the Ultrapure water system.  $\text{Zn}(\text{CF}_3\text{SO}_3)_2$  ( $\text{Zn}(\text{OTf})_2$ ) (Adamas) was dissolved in deionized water to prepare 1.54 M and 2 M  $\text{Zn}(\text{OTf})_2$  electrolytes. Electrolytes with varying TM-Urea concentrations were prepared by adding 0.1, 0.3, and 0.5 mL of tetramethylurea (TM-Urea) (Adamas) to 1 mL of a 2 M  $\text{Zn}(\text{OTf})_2$  electrolyte, yielding formulations denoted as 0.1 TM-Urea, 0.3 TM-Urea, and 0.5 TM-Urea, respectively. The 0.1, 0.3, and 0.5 mL TM-Urea solvents correspond to 0.87, 2.50, and 4.17 mmol, respectively. Given that the Urea and dimethylurea (DM-Urea) are solid powders, we add the same molar weight of Urea and DM-Urea into 1 mL 2 M  $\text{Zn}(\text{OTf})_2$  to prepare Urea and DM-Urea based electrolytes. For the convenience of comparison, electrolytes by dissolving 2.5 mmol of Urea or DM-Urea in 1 mL of 2 M  $\text{Zn}(\text{OTf})_2$  solution are denoted as 0.3 Urea and 0.3 DM-Urea, respectively. Additionally, urea/water mixtures were prepared by dissolving 2.5 mmol of each urea-based compound (Urea, DM-Urea, TM-Urea) in deionized water to form  $\text{H}_2\text{O}/\text{Urea}$ ,  $\text{H}_2\text{O}/\text{DM-Urea}$ , and  $\text{H}_2\text{O}/\text{TM-Urea}$  solutions. The preparation of electrolyte is easy to scale up by adjusting the volume of the electrolyte and additives.

**Cathodes:** The  $\text{V}_2\text{O}_5 \cdot n\text{H}_2\text{O}$  (VOH) cathode material was synthesized by reacting  $\text{V}_2\text{O}_5$  powder (Energy Chemical) with  $\text{H}_2\text{O}_2$  (Aladdin) at room temperature, following methods reported in the literature.<sup>[S1,S2]</sup> Typically, 0.364 g of  $\text{V}_2\text{O}_5$  powder was added to 1.6 mL of 30%  $\text{H}_2\text{O}_2$  in 20 mL of deionized water. The  $\text{V}_2\text{O}_5$  powder quickly dissolved, forming a deep red solution. After resting for 10 h, the VOH deposits were collected, thoroughly washed with water, and freeze-dried for 12 h. The VOH working electrode was prepared by blending the active material, Super P carbon (Timcal), and polyvinylidene fluoride (PVDF) (Aladdin) in a 7:2:1 weight ratio using N-methyl-2-pyrrolidone (NMP) (Aladdin) as the solvent. The resulting slurry was applied to titanium (Ti) foil (Qingyuan Metal Materials) and dried at 60°C for 10 h under vacuum.

### Cell assembling

**Coin cells:** Zn||Zn symmetric cells were assembled using commercial zinc (Zn) foil (50  $\mu\text{m}$  thickness, 12 mm diameter) (Qingyuan Metal Materials) and Whatman glass microfiber (GF/D) separators (16 mm diameter). Zn||copper (Cu) half-cells were constructed with commercial Cu foil (11  $\mu\text{m}$  thickness, 12 mm diameter) (Qingyuan Metal Materials), Zn foil (50  $\mu\text{m}$  thickness, 12 mm diameter), and GF/D separators (16 mm diameter). Similarly, Zn||Ti half-cells were assembled using commercial Ti foil (20  $\mu\text{m}$  thickness, 12 mm diameter), Zn foil (50  $\mu\text{m}$  thickness, 12 mm diameter), and GF/D separators (16 mm diameter). Zn||VOH full cells were constructed with Zn foil (50 or 20  $\mu\text{m}$  thickness, 12 mm diameter) as the anode, VOH as the cathode (12 mm diameter), and GF/D separators (16 mm diameter). The typical mass loading of the prepared cathode was 2–3  $\text{mg cm}^{-2}$  for the coin-type cells. All cells were assembled in CR2032 coin-type casings, with approximately 80  $\mu\text{L}$  of electrolyte added to each cell.

**Pouch cells:** Each pouch Zn||VOH full cell was composed of a  $3 \times 3 \text{ cm}^2$  Zn foil ( $20 \mu\text{m}$  thickness) as the anode,  $3 \times 3 \text{ cm}^2$  VOH as the cathode, and a  $3 \times 3 \text{ cm}^2$  GF/D separator. The pouch cell was sealed in an aluminum (Al)–plastic film (Olegeeeino), with 2 mL of electrolyte added. The typical mass loading of the VOH cathode was  $26.7 \text{ mg cm}^{-2}$  for pouch cells.

### Electrochemical tests

Basic electrochemical tests were conducted using a Solartron 1470E electrochemical workstation, while long-term cycling tests were performed on a LANHE CT3002A battery-testing system. The  $\text{Zn}^{2+}$  plating/stripping Coulombic efficiency (CE) was evaluated using asymmetric Zn||Cu cells, with a cut-off voltage set at 0.5 V. The cycling stability of Zn electrodes was assessed using symmetric Zn||Zn cells. Zn nucleation overpotentials were determined from Zn||Ti asymmetric cells by cyclic voltammetry (CV) in the range of  $-0.3$  to  $1.0 \text{ V}$  at a scan rate of  $1 \text{ mV s}^{-1}$ . LSV and Tafel curves were obtained using a three-electrode configuration. For Tafel measurements, Zn served as the working electrode, Ti foil as the counter electrode, and a saturated calomel electrode (SCE) as the reference. Scans were performed from  $-0.58$  to  $-1.18 \text{ V}$  (vs SCE) at a rate of  $1 \text{ mV s}^{-1}$ . LSV analysis was carried out using Pt foil as both the working and counter electrodes, with SCE as the reference electrode, over a potential range of  $-0.5$  to  $-2.0 \text{ V}$  at a scan rate of  $1 \text{ mV s}^{-1}$ . Chronoamperometry (CA) tests were performed using Zn||Zn cells under a constant overpotential of  $-200 \text{ mV}$  for 800 s. The electric double-layer (EDL) capacitance was evaluated from CV scans at various rates (10, 12, 14, 16, and  $18 \text{ mV s}^{-1}$ ) over a voltage range of  $-15$  to  $15 \text{ mV}$  using Zn||Zn symmetric cells. The differential capacitance-potential curve for the Zn||Ti cell was obtained through alternating current (AC) voltammetry at a scan rate of  $20 \text{ mV s}^{-1}$ , frequency of 50 Hz, amplitude of 5 mV, and phase angles of  $0^\circ$  and  $90^\circ$ , with a voltage range of 0 to 1 V. CV measurements of Zn||VOH full cells were conducted within a potential window of 0.2–1.7 V. EIS measurements were conducted with an amplitude of 5 mV over a frequency range of 100 mHz to 100 kHz. The  $\text{Zn}^{2+}$  transference number ( $t_{\text{Zn}^{2+}}$ ) was calculated using Equation (1):

$$t_{\text{Zn}^{2+}} = \frac{I_s (\Delta V - I_0 R_0)}{I_0 (\Delta V - I_s R_s)} \dots \dots \dots (1)$$

where  $I_0$  and  $I_s$  represent the initial and steady-state currents ( $\mu\text{A}$ ), respectively, derived from the current–time ( $i$ – $t$ ) curve, and  $R_0$  and  $R_s$  are the interfacial resistances before and after polarization, respectively. A constant potential ( $\Delta V$ ) of 20 mV was applied. All symmetric cells were allowed to rest for 5 h prior to measurement. Differential capacitance–potential curves were characterized using phase-selective alternating current (AC) voltammetry in asymmetric Zn||Ti cells. The scans were performed at a rate of  $10 \text{ mV s}^{-1}$  over a potential range of 0.7 to 0 V vs  $\text{Zn}^{2+}/\text{Zn}$ . The AC frequency was 6 Hz, with a modulation amplitude of 5 mV. Phase angles of  $0^\circ$  and  $90^\circ$  were selected for analysis. The phase shift ( $\Phi$ ) was calculated using Equation (2):

$$\Phi = \tan^{-1} \frac{i_{90}}{i_0} \dots \dots \dots (2)$$

where  $i_0$  and  $i_{90}$  are the AC currents at phase angles of  $0^\circ$  and  $90^\circ$ , respectively. The impedance ( $Z$ ) was calculated using Equation (3):

$$Z = \frac{A}{\sqrt{i_{90}^2 + i_0^2}} \dots\dots\dots(3)$$

The real ( $Z_{re}$ ) and imaginary ( $Z_{im}$ ) components of the impedance were derived as follows:

$$Z_{re} = Z \cos \Phi \dots\dots\dots(4)$$

$$Z_{im} = Z \sin \Phi \dots\dots\dots(5)$$

The corresponding capacitance ( $C$ ) was calculated using Equation (6):

$$C = (2\pi f Z_{im})^{-1} \dots\dots\dots(6)$$

where  $f$  is the frequency of the AC perturbation. The distribution of relaxation time (DRT) was extracted from the EIS data using the DRT-TOOLS toolbox in MATLAB R2023b, developed by Professor Francesco Ciucci's research group. The toolbox is freely available at: <https://github.com/ciuccislab>.

## Characterizations

Fourier transform infrared (FTIR) spectra were collected using a NICOLET iS50 FT-IR spectrometer.  $^1\text{H}$  nuclear magnetic resonance ( $^1\text{H}$  NMR) spectra were recorded on a Bruker 600 MHz liquid-state NMR spectrometer. Raman spectra and corresponding mapping images were acquired using a Horiba HR-Evolution Raman microscope with a 532 nm excitation laser. The electrolyte viscosity is measured using the NDJ-5S digital viscometer. The pH values were measured using a Bante210-CN pH meter. Contact angle measurements of various solutions on Zn foil surfaces were performed using a JC2000D5E contact angle goniometer. Transmission electron microscopy (TEM) images were obtained using an FEI Talos F200X G2 microscope operated at 200 kV. X-ray diffraction (XRD) patterns and XRD pole figures were collected using a Rigaku MiniFlex600 and a Rigaku SmartLab diffractometer, respectively, both equipped with Cu  $K\alpha$  radiation sources. X-ray photoelectron spectroscopy (XPS) measurements were conducted on a ThermoFisher ESCALAB 250Xi spectrometer, with all binding energies calibrated to the C 1s peak at 284.8 eV. Scanning electron microscopy (SEM) images were captured using a Nova NanoSEM 450 field-emission SEM. *In situ* optical microscopy (OM) was used to visualize the dynamic nucleation and growth of Zn in different electrolytes. The images were recorded on a Fenye ZLD200-4XC microscope equipped with a digital camera, using a Zn||Cu electrolytic cell operated at a current density of  $20 \text{ mA cm}^{-2}$ .

## Theoretical calculations

Molecular dynamics (MD) simulations: All-atom MD simulations of bulk electrolytes were performed using the GROMACS 2018.3 software.<sup>[S3]</sup> The electrolyte systems were modeled using the Assisted Model Building and Energy Refinement 3

(AMBER3) force field.<sup>[54]</sup> Force field parameters for OTf<sup>-</sup> and TM-Urea were generated with AnteChamber Python Parser interfacE (ACPYPE), while parameters for Zn<sup>2+</sup> were adopted from the built-in GROMACS force field. Water molecules were modeled using the extended simple point charge (SPC/E) model. Electrostatic interactions were treated using the Particle-Mesh Ewald (PME) method, and van der Waals (vdW) interactions were handled using a cutoff scheme with a radius of 10 Å. All simulations were carried out in the NpT ensemble at 298.15 K and 1.01 atm within a cubic box applying periodic boundary conditions in all three Cartesian directions. Each system was initially equilibrated for 10 ns (5,000,000 steps with a 2 fs time step) using a velocity-rescale thermostat and the Berendsen barostat to control temperature and pressure, respectively. Following equilibration, a production run of 10 ns (5,000,000 steps) was performed for data collection. During the production stage, pressure was regulated using the Parrinello-Rahman barostat. Radial distribution functions (RDFs,  $g(r)$ ) were calculated using built-in GROMACS tools, while coordination numbers ( $N(r)$ ) and molecular snapshots were analyzed with the open-source Visual Molecular Dynamics (VMD) software.<sup>[55]</sup>

Density functional theory (DFT) calculations: For isolated systems, DFT calculations were conducted using Gaussian 16.<sup>[56]</sup> All geometries were optimized using the Becke-3-parameter Lee-Yang-Parr (B3LYP) functional with the 6-31G(d,p) basis set for H, C, N, O, F, and S atoms. The Zn atom was treated using the Stuttgart-Dresden (SDD) pseudopotential. Frequency calculations at the same level were performed to confirm that each optimized structure corresponds to a true minimum (*i.e.*, no imaginary frequencies). For periodic systems, DFT calculations were carried out using the Vienna Ab initio Simulation Package (VASP).<sup>[57]</sup> Core electrons were described with projector augmented wave (PAW) pseudopotentials,<sup>[58]</sup> and the exchange-correlation functional was treated using the Perdew-Burke-Ernzerhof (PBE) generalized-gradient approximation (GGA).<sup>[59]</sup> A plane-wave energy cutoff of 450 eV was applied. Brillouin zone sampling was performed using a  $\Gamma$ -centered Monkhorst-Pack k-point mesh of  $2 \times 2 \times 2$ . The convergence criteria were set to  $10^{-5}$  eV for electronic energy and  $0.02 \text{ eV} \cdot \text{\AA}^{-1}$  for forces during geometry optimization.

## Supplementary Figures and Tables

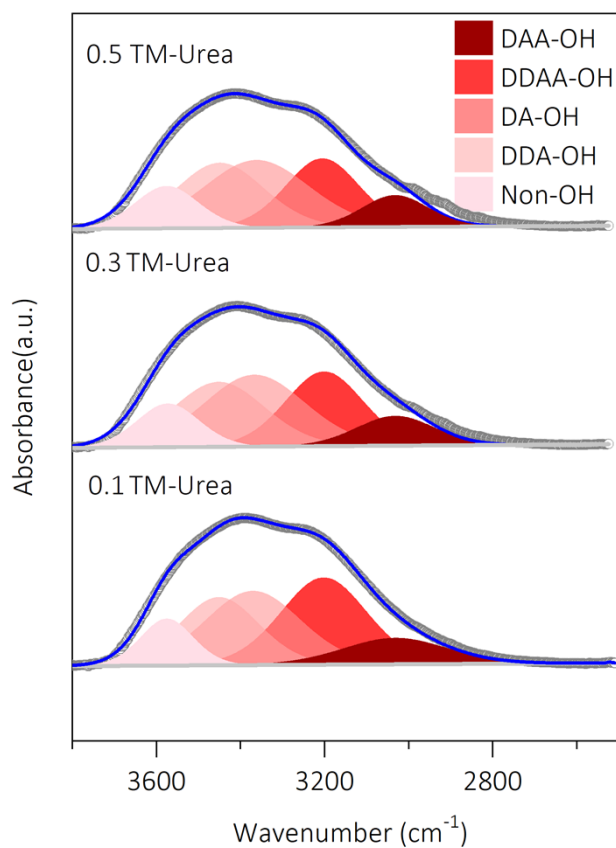

**Fig. S1** Deconvoluted FTIR spectra of O–H stretching vibrations in 0.1-0.5 TM-Urea electrolytes, representing water molecules engaged in different HB environments: DAA-OH, DDAA-OH, DA-OH, DDA-OH, and Non-OH.

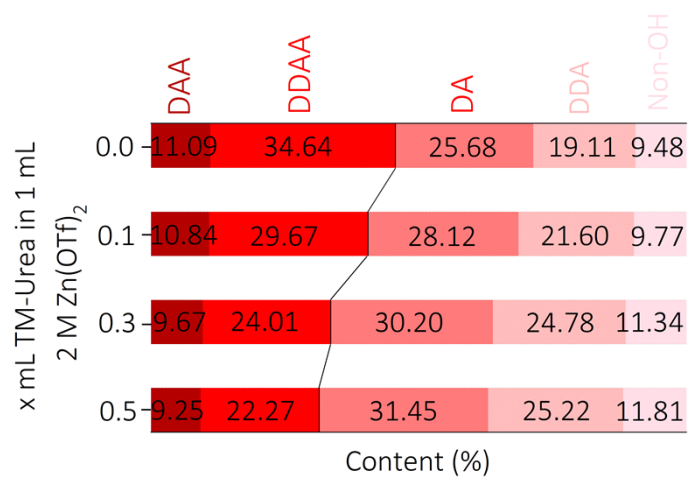

**Fig. S2** Relative proportions of DAA, DDAA, DA, DDA, and Non-OH species in 2 M Zn(OTf)<sub>2</sub> and 0.1–0.5 TM-Urea electrolytes.

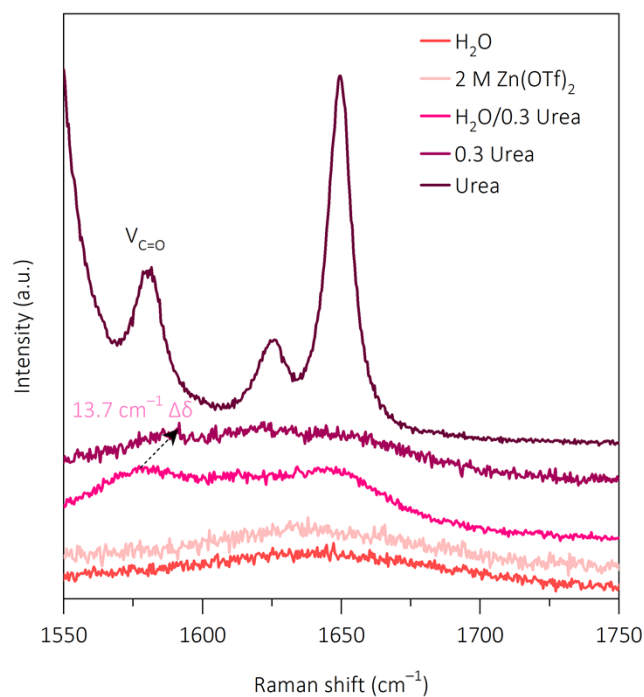

**Fig. S3** Raman spectra of the C=O stretching region for Urea in different solutions.

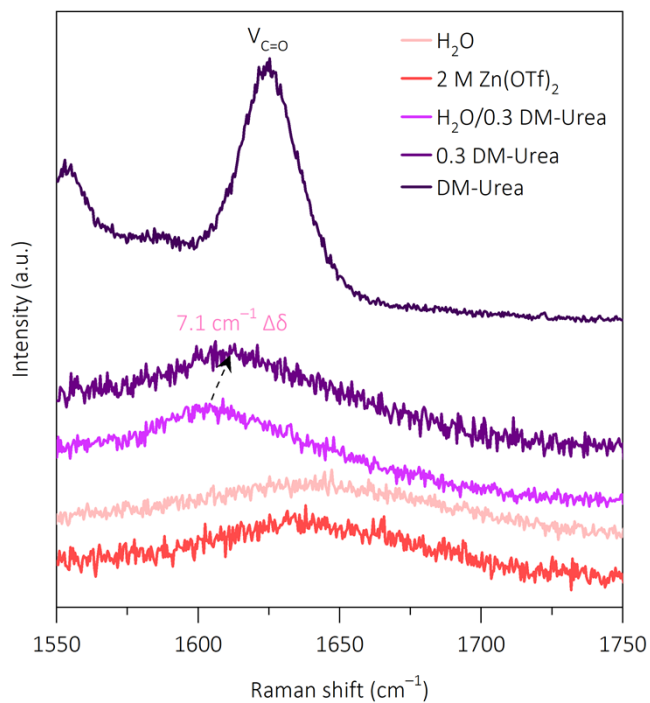

**Fig. S4** Raman spectra of the C=O stretching region for DM-Urea in various solutions.

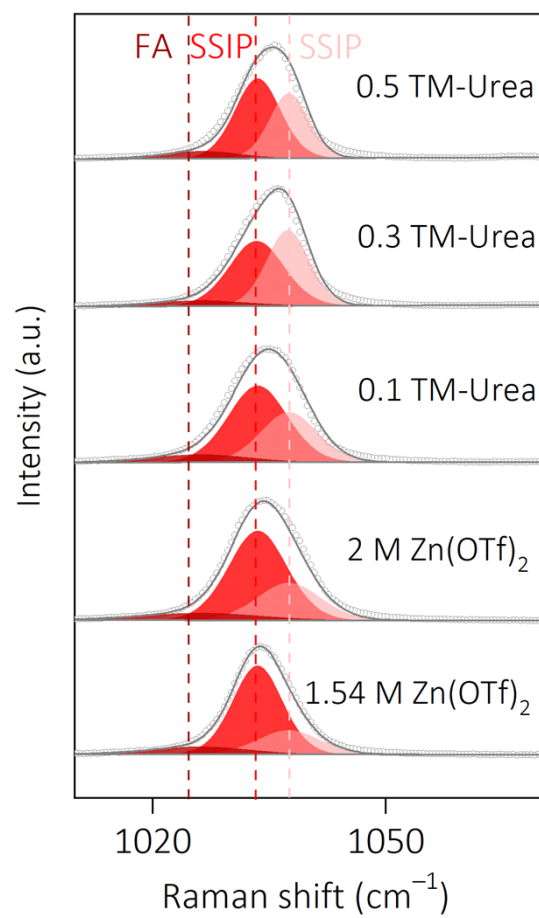

**Fig. S5** Peak-fitted Raman spectra of various electrolytes at 1020–1050 cm<sup>-1</sup>.

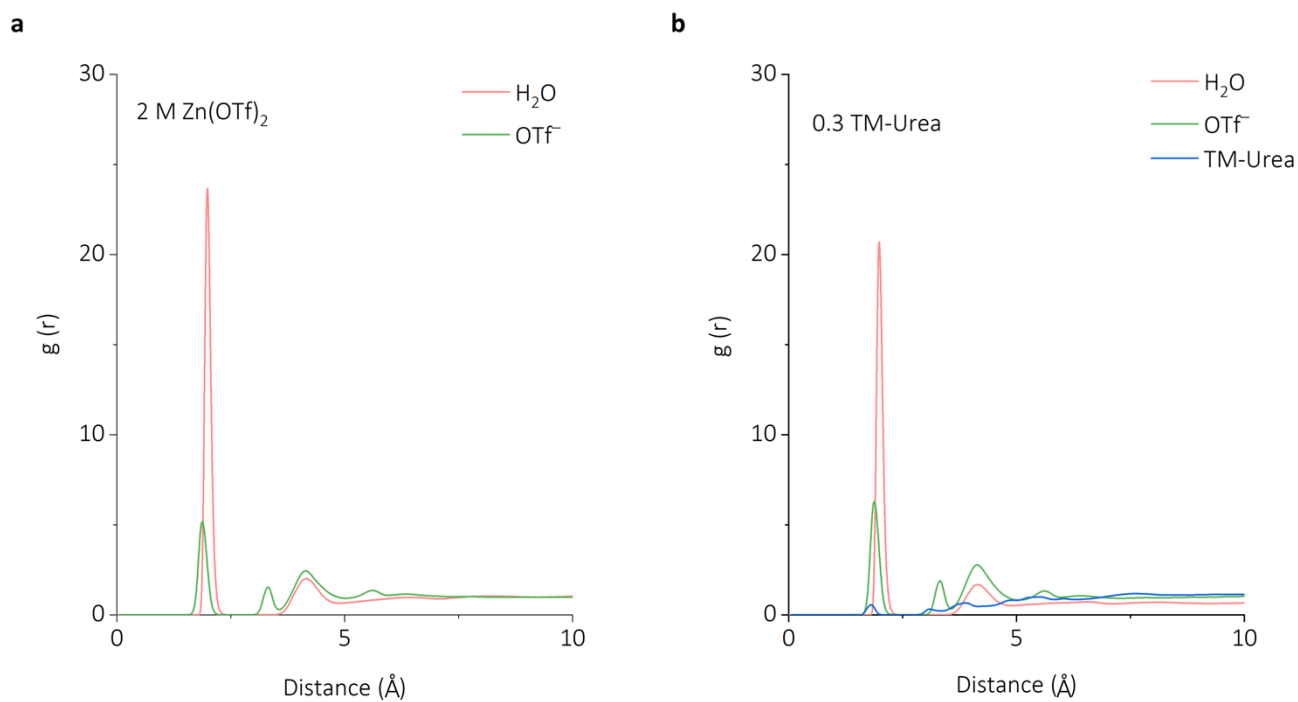

**Fig. S6** The  $g(r)$  of  $Zn^{2+}$  with other species in electrolytes.

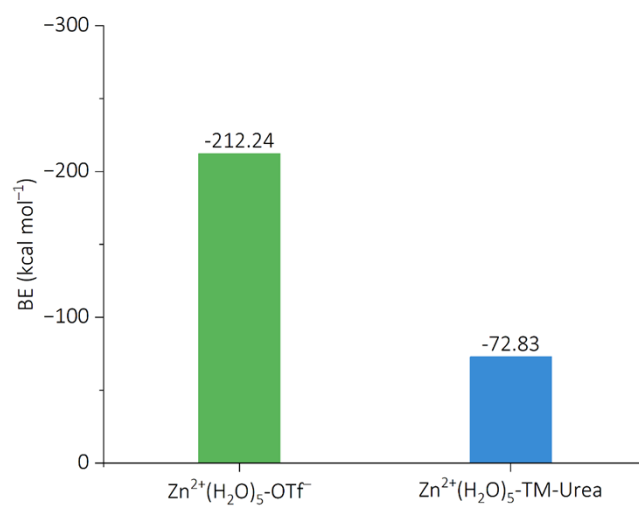

**Fig. S7** BE of Zn<sup>2+</sup>(H<sub>2</sub>O)<sub>5</sub> with OTf<sup>-</sup> and TM-Urea.

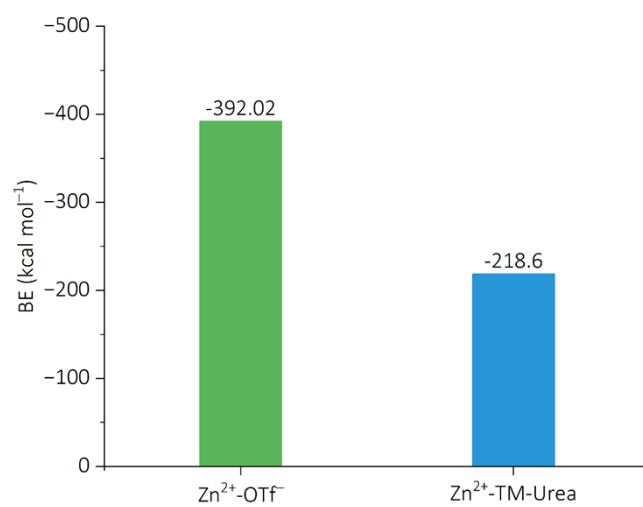

**Fig. S8** BE of Zn<sup>2+</sup> with OTf<sup>-</sup> and TM-Urea.

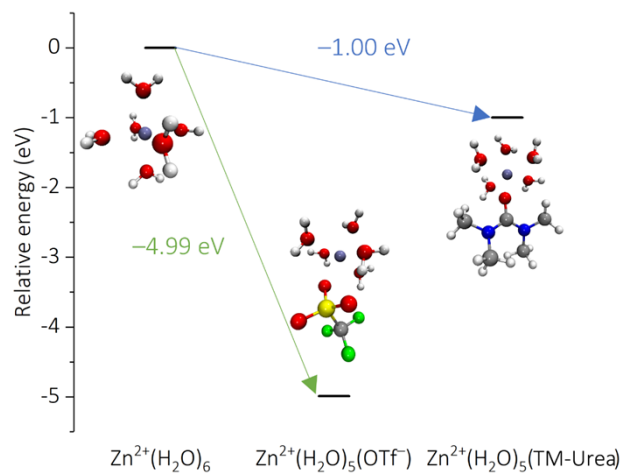

**Fig. S9** Substitution energy for replacing one  $\text{H}_2\text{O}$  in  $\text{Zn}^{2+}(\text{H}_2\text{O})_6$  with either  $\text{OTf}^-$  or TM-Urea.

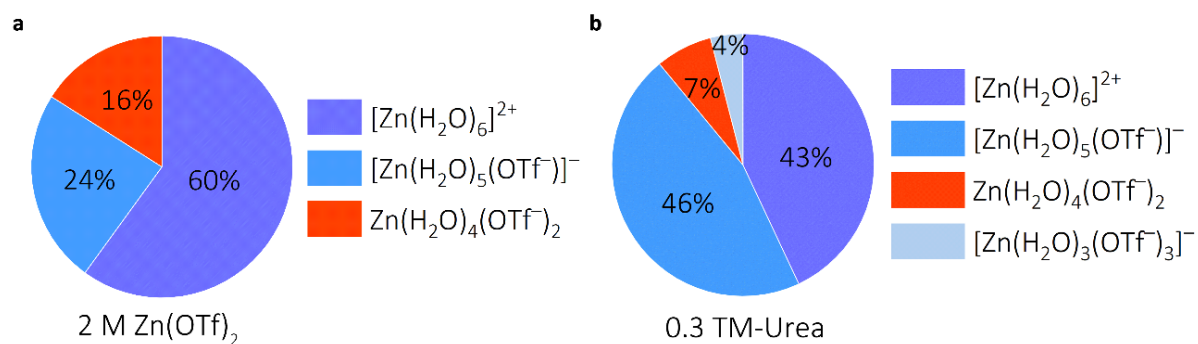

**Fig. S10** Distributions of possible Zn<sup>2+</sup>-solvation compositions of (a) 2 M Zn(OTf)<sub>2</sub> and (b) 0.3 TM-Urea from MD simulations.

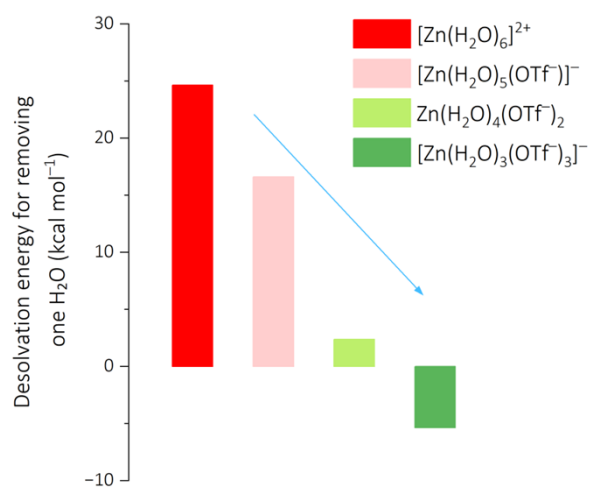

**Fig. S11** Desolvation energies for removal of one H<sub>2</sub>O molecule from Zn<sup>2+</sup>-solvation structures.

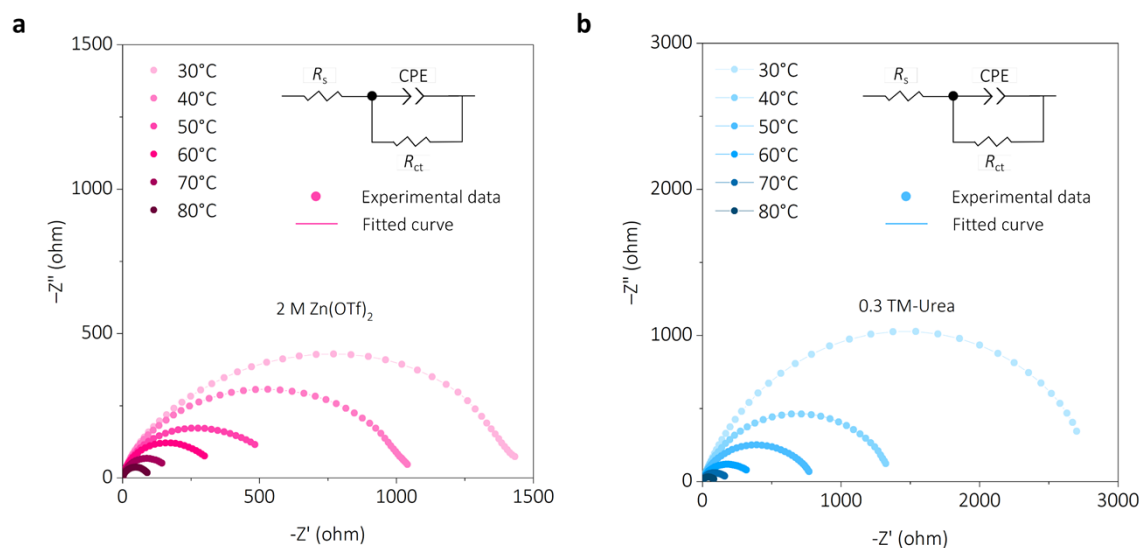

**Fig. S12** EIS curves of Zn||Zn symmetrical cells in (a) 2 M Zn(OTf)<sub>2</sub> and (b) 0.3 TM-Urea electrolytes over the frequency range of 0.1 Hz to 100 kHz at temperature intervals of 10 °C between 30 and 80 °C. EIS tests were performed without applying any voltage or current. Insets are the corresponding equivalent circuits, where  $R_s$  represents the internal resistance arising from the electrolyte, separator, and electrical contacts;  $R_{ct}$  denotes the Faradaic charge-transfer resistance at the interfaces; and CPE is the double layer capacitance.

The  $E_a$  of Zn electrodes in different electrolytes is determined from Nyquist plots of Zn||Zn cells by analyzing the temperature-dependent  $R_{ct}$ .<sup>[S10]</sup>  $E_a$  is calculated from the slope of the linear fit of  $\ln(1/R_{ct})$  vs.  $1000/T$ .

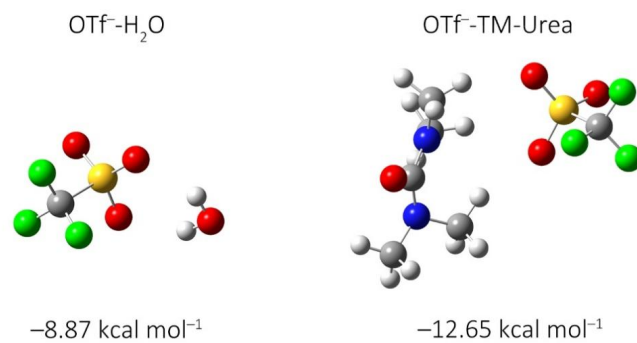

**Fig. S13** BE of OTf<sup>-</sup> with H<sub>2</sub>O and TM-Urea.

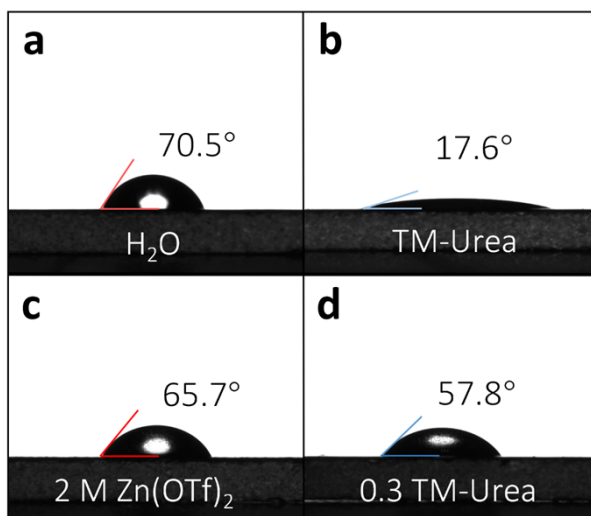

**Fig. S14** Contact angle measurements of (a) pure H<sub>2</sub>O, (b) TM-Urea as well as (c) 2 M Zn(OTf)<sub>2</sub> and (d) 0.3 TM-Urea electrolytes droplets on the bare Zn.

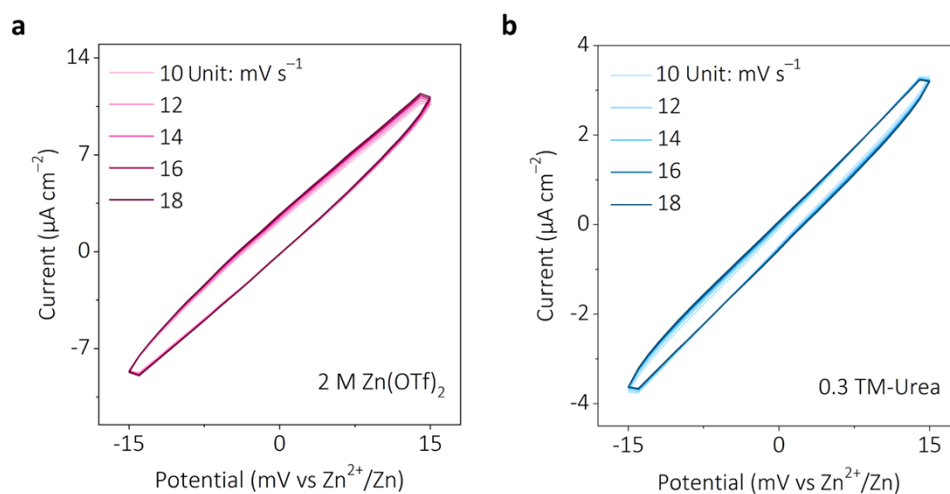

**Fig. S15** CV curves for Zn||Zn symmetric cells using (a) 2 M Zn(OTf)<sub>2</sub> and (b) 0.3 TM-Urea electrolytes in a voltage range of -15 mV to 15 mV (non-Faradaic region) under various scanning rates.

The EDL capacitance is calculated using the equation of  $C=i/v$ , where  $C$  is the capacitance,  $i$  is the current, and  $v$  is the scan rate.  $i$  is defined as half the difference between the anodic and cathodic currents at each scan rate.<sup>[S11]</sup>

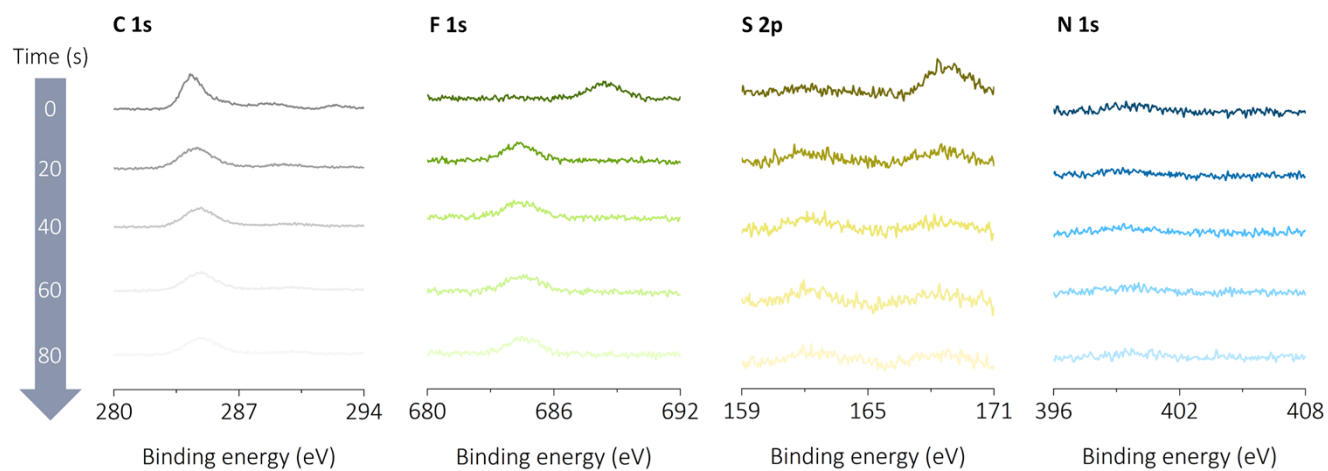

**Fig. S16** XPS depth profiles of the Zn anode cycled in the 2 M Zn(OTf)<sub>2</sub> electrolyte (10 cycles at 5 mA cm<sup>-2</sup>, 5 mAh cm<sup>-2</sup>), showing the evolution of C 1s, F 1s, S 2p, and N 1s signals with Ar<sup>+</sup> sputtering time (0–80 s).

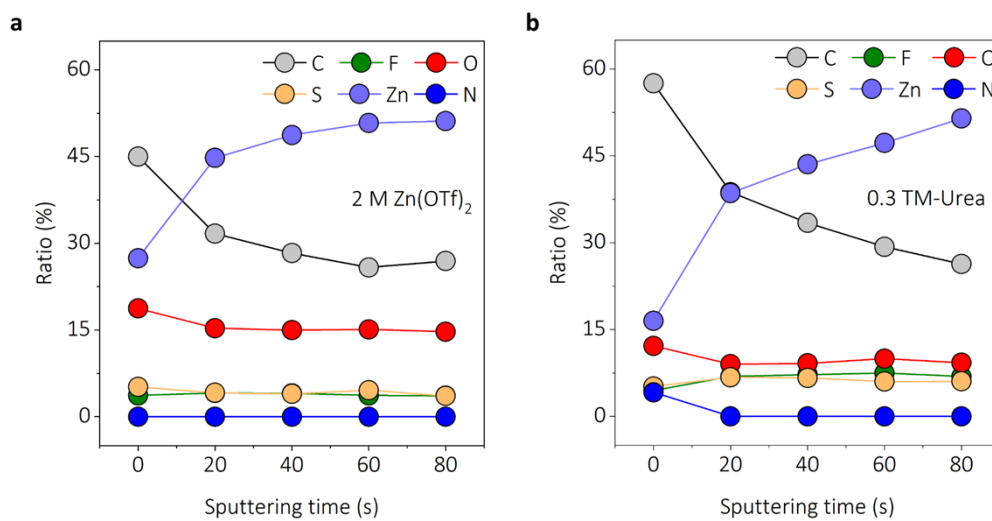

**Fig. S17** Atomic composition ratios of the SEI on cycled Zn electrodes in (a) 2 M Zn(OTf)<sub>2</sub> and (b) 0.3 TM-Urea electrolytes at various Ar<sup>+</sup> sputtering times.

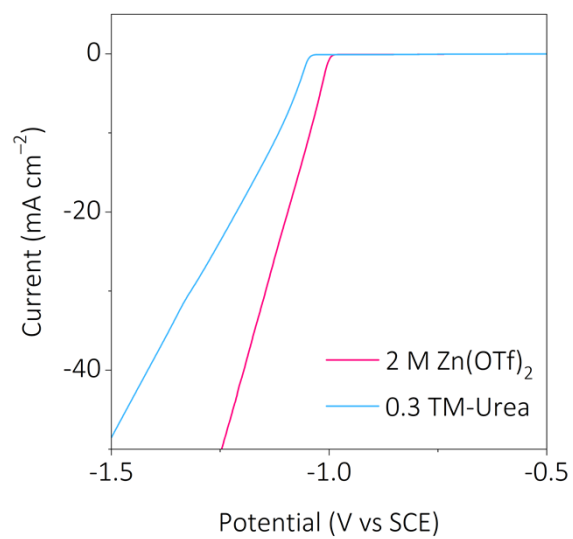

**Fig. S18** LSV curves of 2 M Zn(OTf)<sub>2</sub> and 0.3 TM-Urea electrolytes at 1 mV s<sup>-1</sup>.

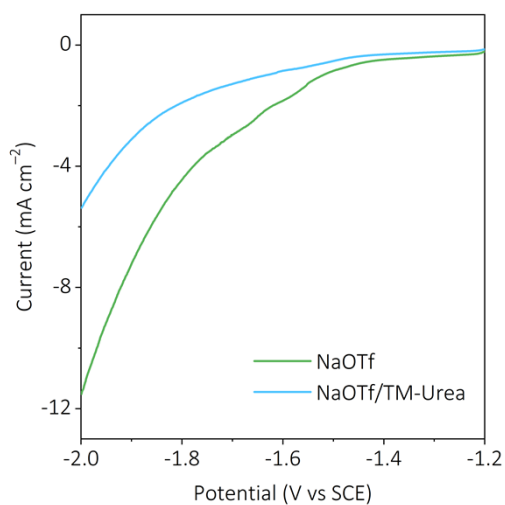

**Fig. S19** LSV curves of NaOTf and NaOTf/TM-Urea electrolytes measured at  $1 \text{ mV s}^{-1}$ , using Zn foil as the working electrode, Ti foil as the counter electrode, and a SCE as the reference electrode.

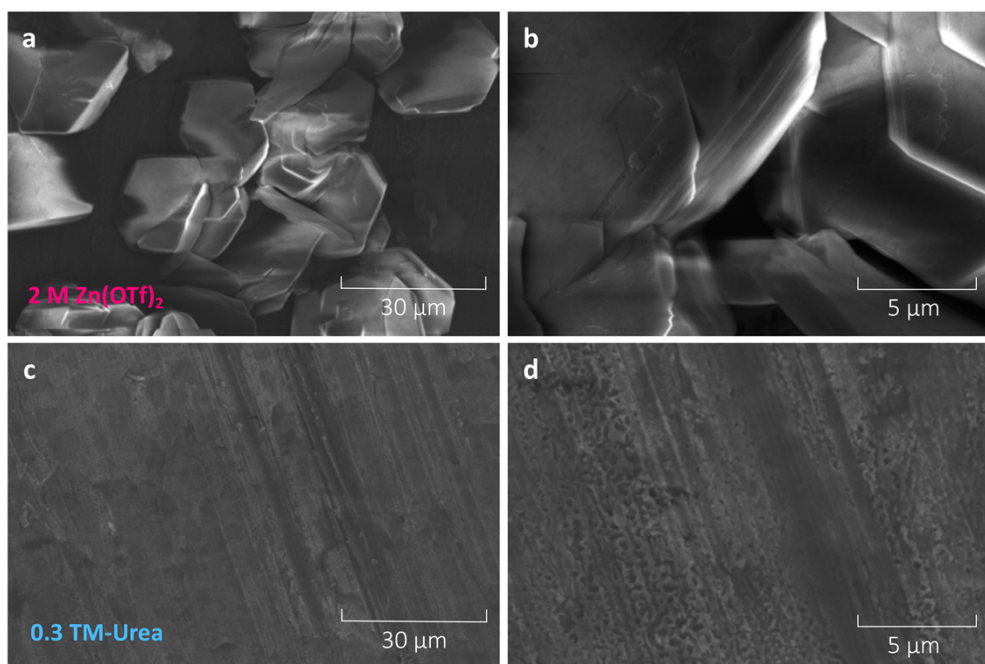

**Fig. S20** SEM images of Zn electrodes after 3 days of soaking in (a,b) 2 M Zn(OTf)<sub>2</sub> and (c,d) 0.3 TM-Urea electrolytes. Scale bars: 30 μm in (a,c) and 5 μm in (b,d) (magnified view).

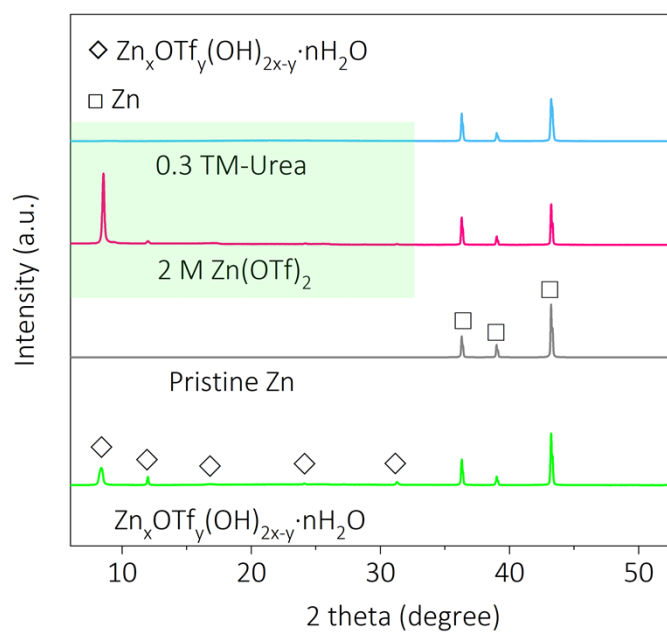

**Fig. S21** XRD patterns of Zn foils after soaking in various electrolytes for 3 days.

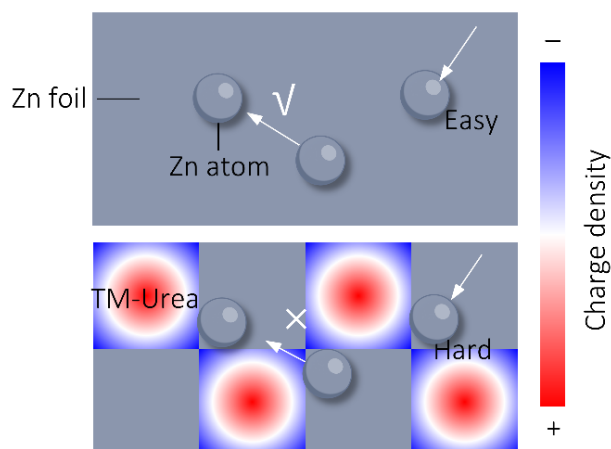

**Fig. S22** TM-Urea adsorbed on the Zn anode surface regulates  $\text{Zn}^{2+}$  diffusion from 2D to 3D.

As illustrated, we provide a schematic showing the deposition mode of Zn with and without TM-Urea adsorption on the Zn surface. Once TM-Urea adsorbs on the Zn surface, it forms a mesh-like structure that inhibits 2D diffusion of  $\text{Zn}^{2+}$ , thereby suppressing dendrite formation.

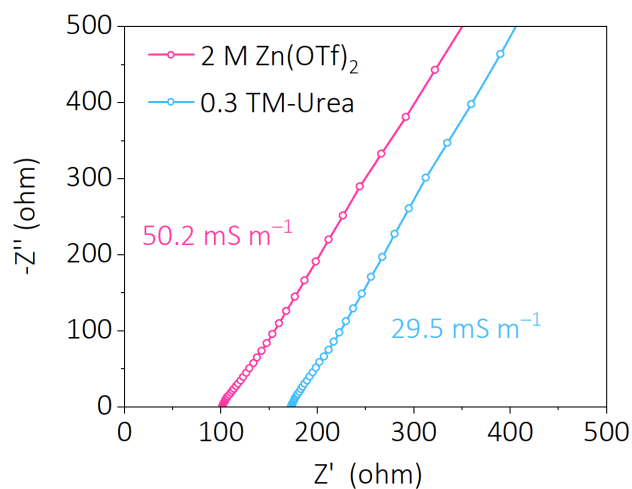

**Fig. S23** Nyquist plots of the 2 M Zn(OTf)<sub>2</sub> and 0.3 TM-Urea electrolytes measured over the frequency range of 100 kHz to 0.1 Hz for calculating the ionic conductivity.

The ionic conductivity ( $\sigma$ ) was calculated using:

$$\sigma = \frac{L}{R_b S}$$

where  $R_b$  is the bulk resistance obtained from EIS fitting,  $L$  is the thickness of the electrode–electrode (1 cm), and  $S$  is the electrode–electrolyte contact area (0.196 cm<sup>2</sup>).

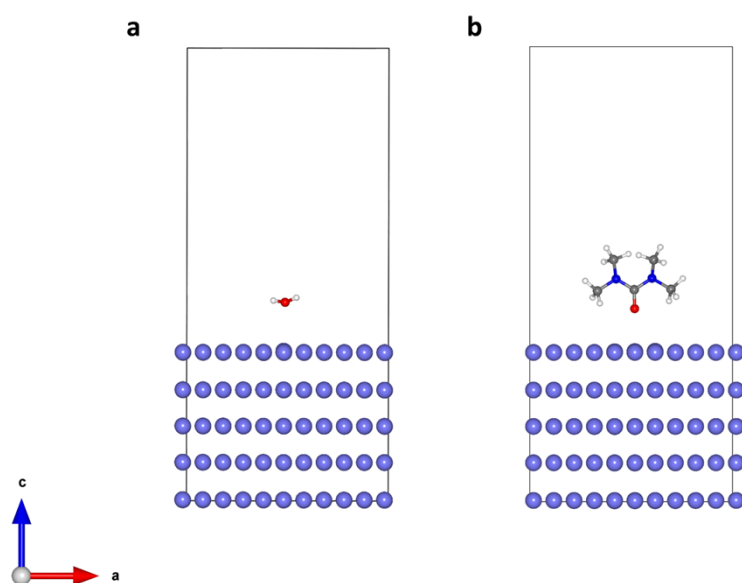

**Fig. S24** Models of the Zn(002) surface with (a) H<sub>2</sub>O or (b) TM-Urea adsorption.

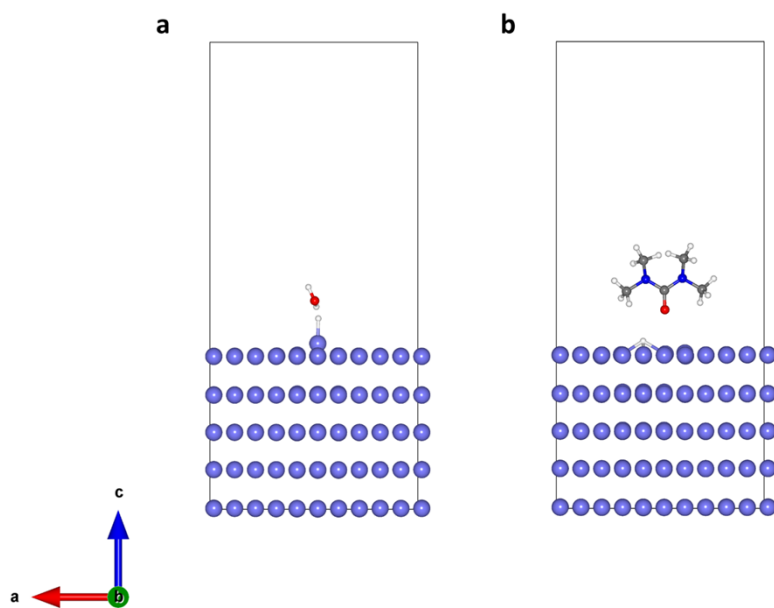

**Fig. S25** Adsorption models of a single H atom on the Zn(002) surface with (a) H<sub>2</sub>O and (b) TM-Urea.

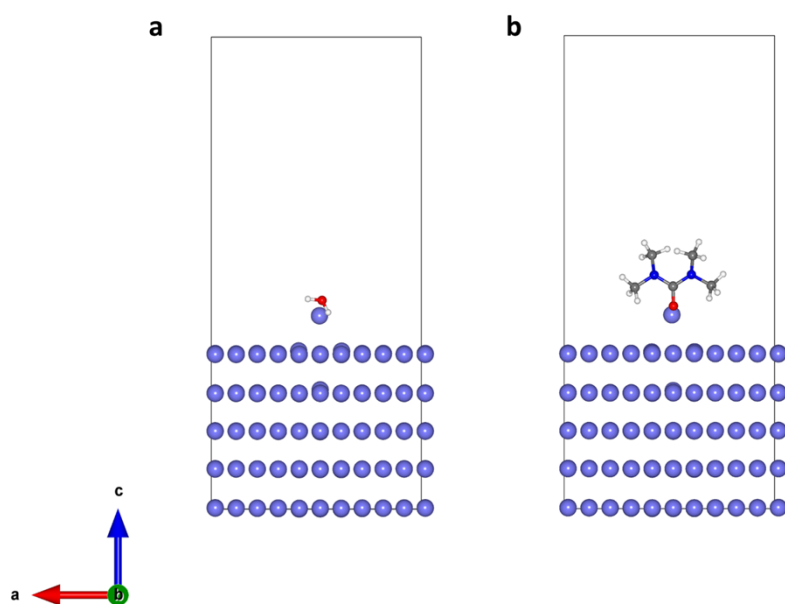

**Fig. S26** Adsorption models of a single Zn atom on the Zn(002) surface with (a) H<sub>2</sub>O and (b) TM-Urea.

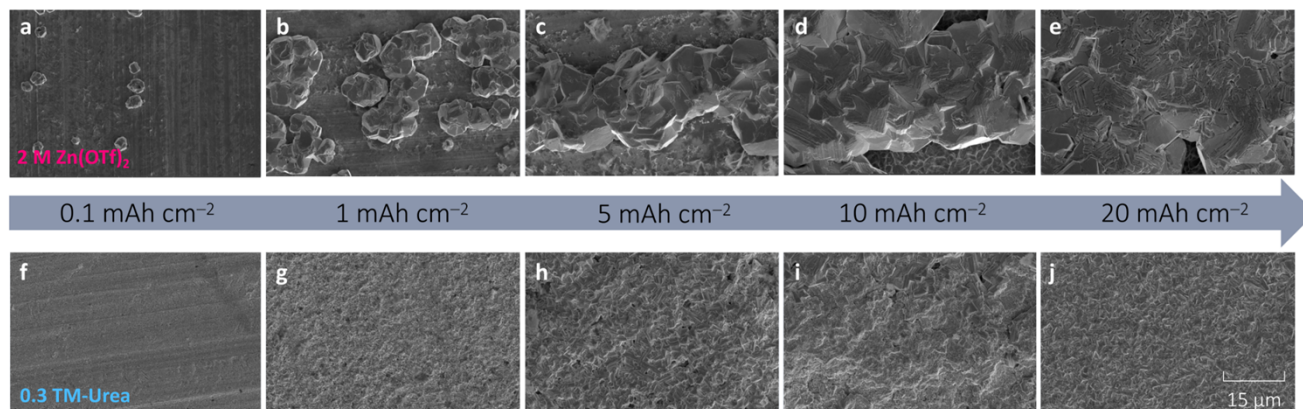

**Fig. S27** SEM images of electrodeposited Zn in (a-d) 2 M Zn(OTf)<sub>2</sub> and (e-h) 0.3 TM-Urea electrolytes at different plating capacities under 20 mA cm<sup>-2</sup>. Scale bar: 15 μm in (a-h).

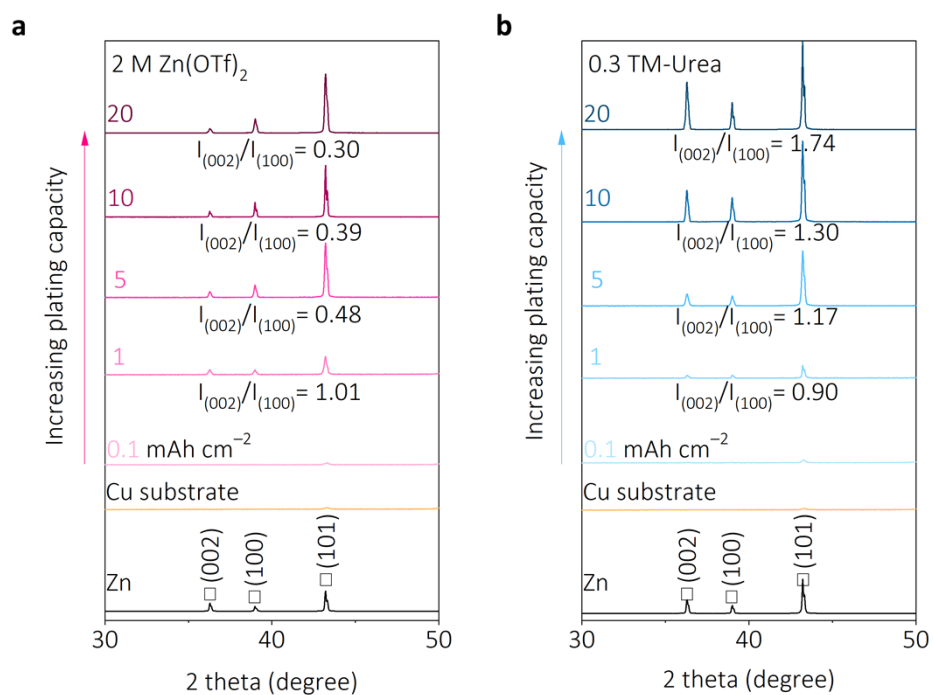

**Fig. S28** XRD patterns of Zn electrodeposits in (a) 2 M Zn(OTf)<sub>2</sub> and (b) 0.3 TM-Urea electrolytes at varying plating capacity at 20 mA cm<sup>-2</sup>.

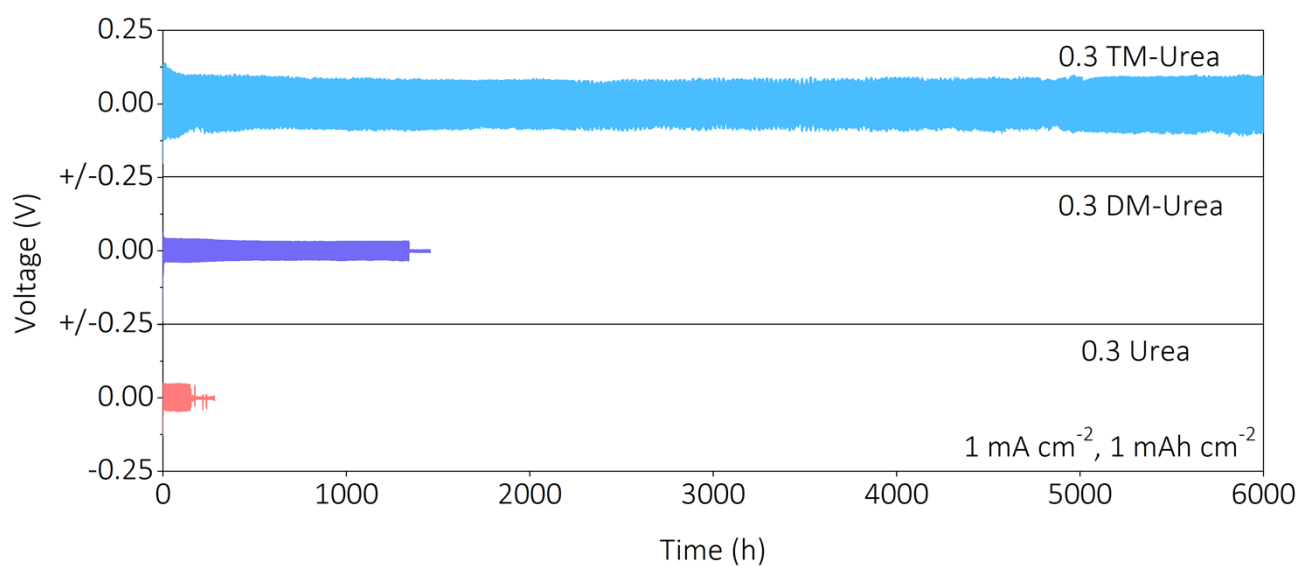

**Fig. S29** Cycling performance of Zn || Zn symmetric cells with 0.3 urea-based electrolytes at 1 mA cm<sup>-2</sup>, 1 mAh cm<sup>-2</sup>.

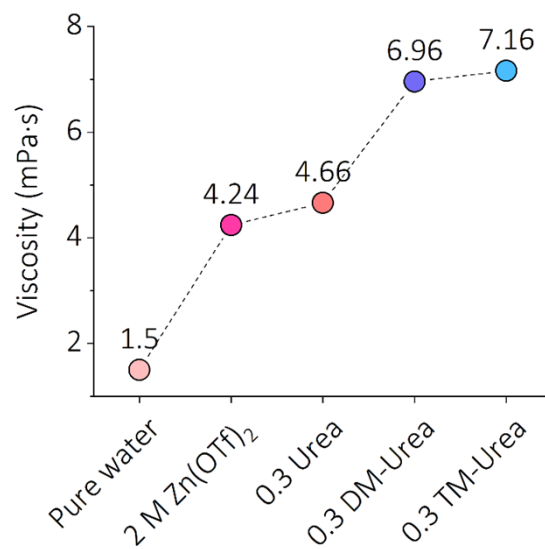

**Fig. S30** Viscosities of pure water as well as 2 M Zn(OTf)<sub>2</sub> and 0.3 Urea (DM-Urea or TM-Urea) electrolytes.

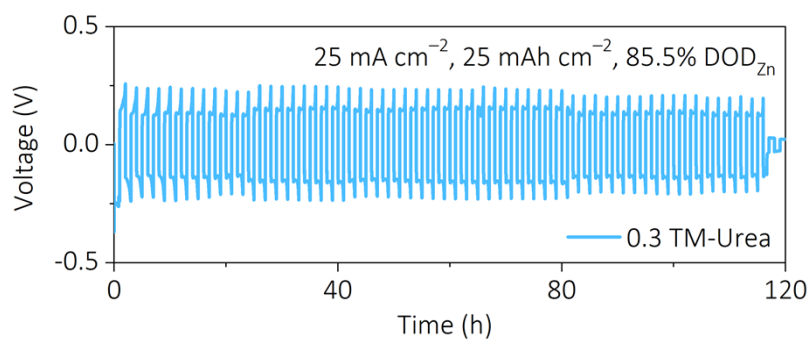

**Fig. S31** Cycling performance of Zn||Zn symmetric cells with the 0.3 TM-Urea electrolyte at 25 mA cm<sup>-2</sup>, 25 mAh cm<sup>-2</sup>.

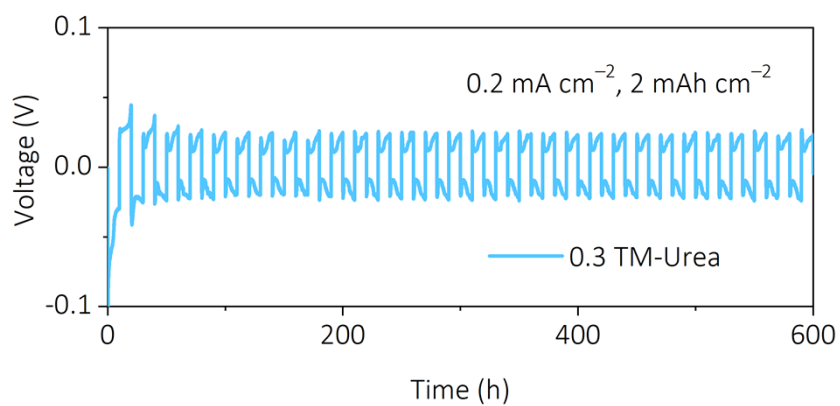

**Fig. S32** Cycling performance of Zn | Zn symmetric cells with the 0.3 TM-Urea electrolyte at  $0.2 \text{ mA cm}^{-2}$ ,  $2 \text{ mAh cm}^{-2}$ .

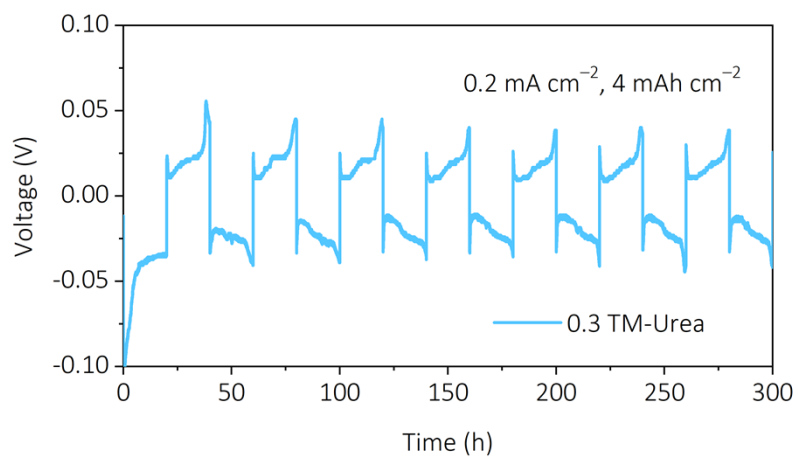

**Fig. S33** Cycling performance of Zn | Zn symmetric cells with the 0.3 TM-Urea electrolyte at 0.2 mA cm<sup>-2</sup>, 4 mAh cm<sup>-2</sup>.

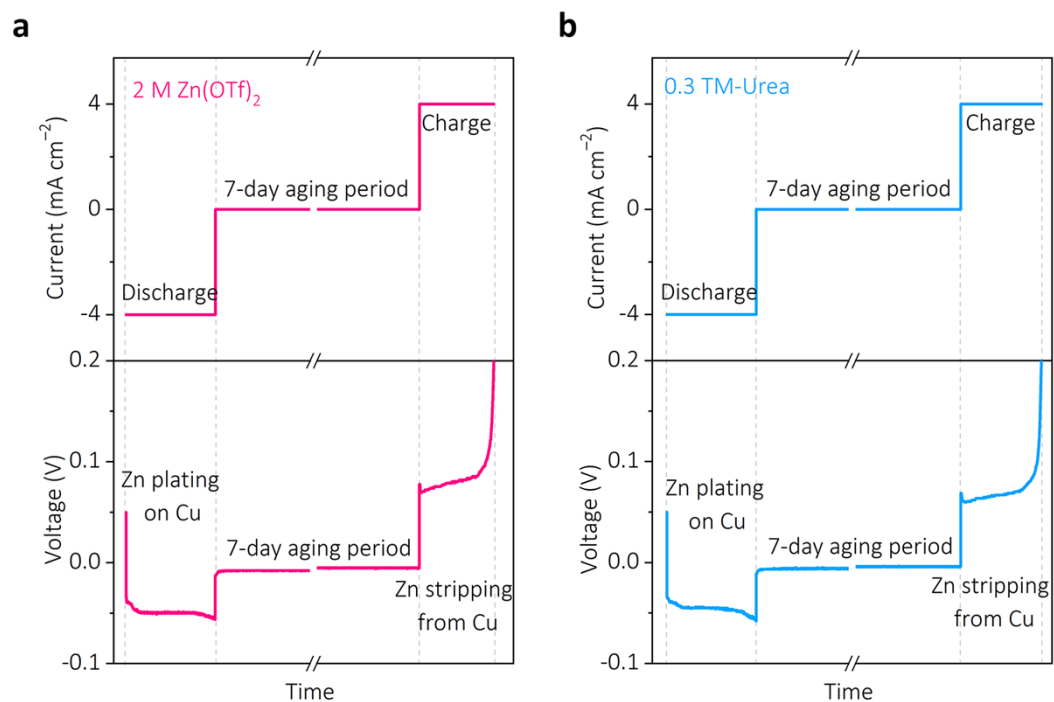

**Fig. S34** Electrochemical test procedure for quantifying aging-induced capacity loss for Zn||Cu cells using 2 M Zn(OTf)<sub>2</sub> and 0.3 TM-Urea electrolytes.

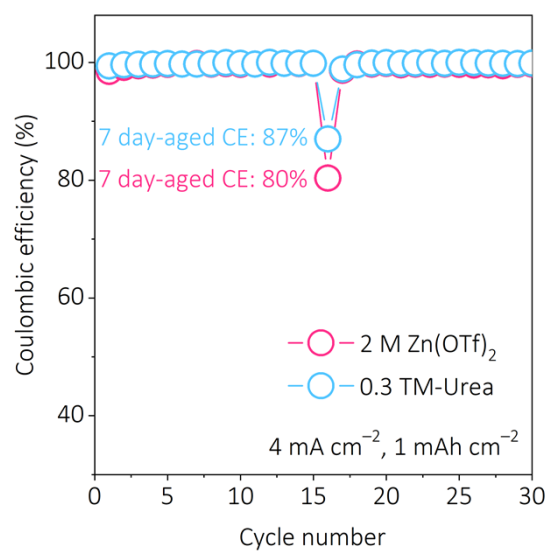

**Fig. S35** CE of Zn || Cu cells using electrolytes with/without TM-Urea including the 7-day aging procedure.

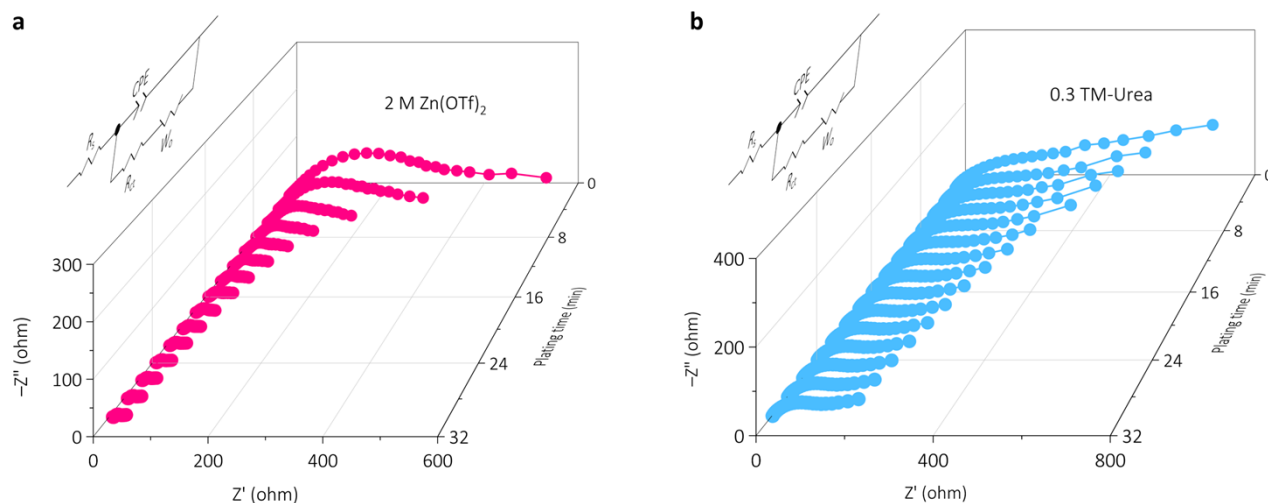

**Fig. S36** Nyquist plots of the Zn||Zn symmetrical cells during the plating process using (a) 2 M Zn(OTf)<sub>2</sub> and (b) 0.3 TM-Urea electrolytes at 5 mA cm<sup>-2</sup>, measured over time. The corresponding equivalent circuits are shown, where  $R_s$  represents the internal resistance arising from the electrolyte, separator, and electrical contacts;  $R_{ct}$  denotes the Faradaic charge-transfer resistance at the interfaces; CPE is the double layer capacitance; and  $W_0$  corresponds to the Warburg impedance associated with ion diffusion into the electrodes. For the EIS measurements, Zn||Zn cells undergo a 2-min discharge at 5 mA cm<sup>-2</sup> followed by a 2-min rest, and this process is repeated 15 times.

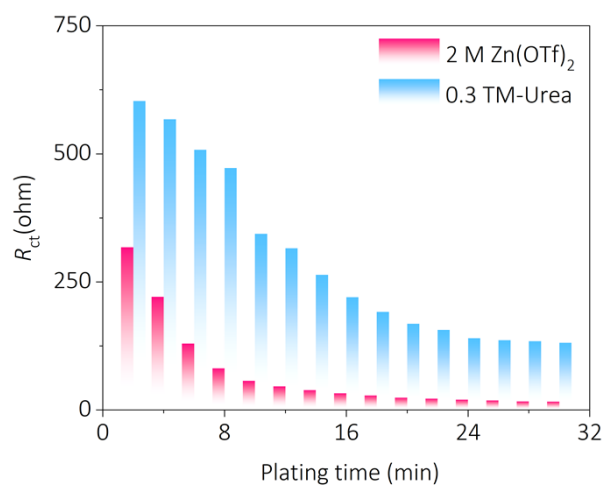

**Fig. S37** The  $R_{ct}$  values obtained by fitting the Nyquist plots using the equivalent circuits.

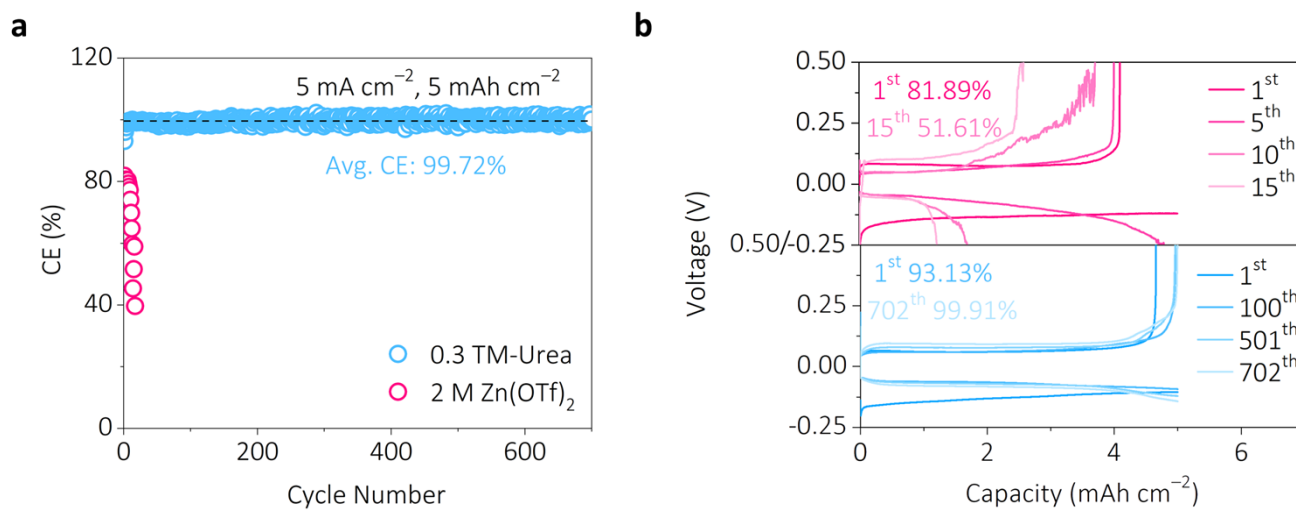

**Fig. S38** (a) CE measurements of Zn||Cu cells using different electrolytes, and (b) the corresponding voltage profiles at different cycles.

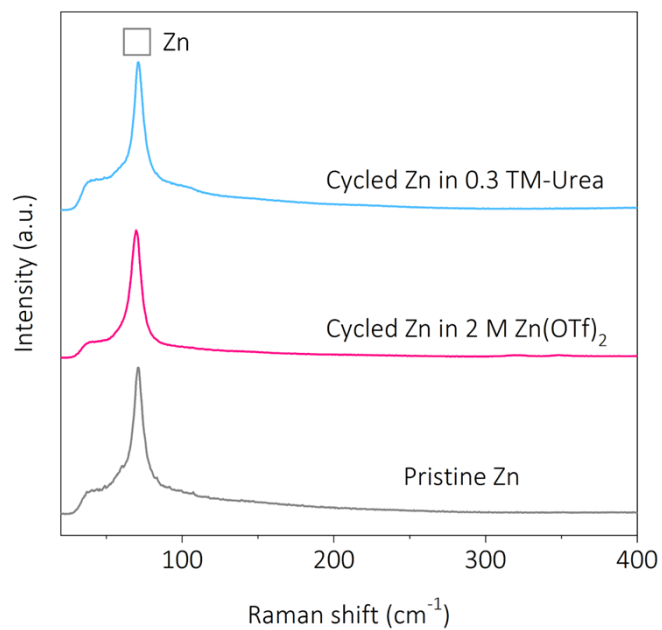

**Fig. S39** Raman spectra of pristine Zn and cycled Zn in different electrolytes. The Raman peak observed at 71 cm<sup>-1</sup> is attributed to the E<sub>2g</sub> mode of Zn metal.

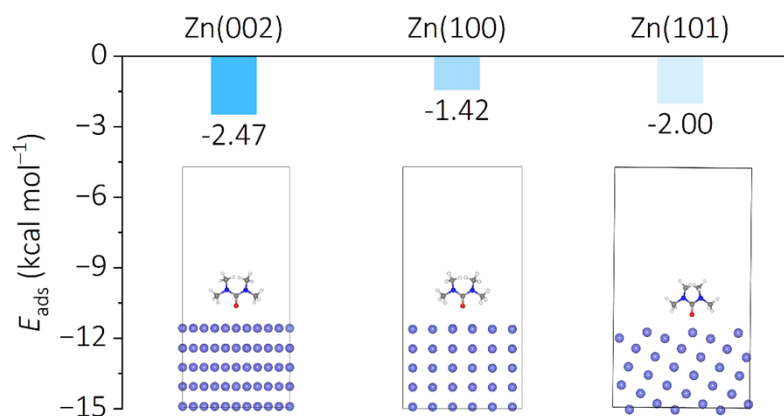

**Fig. S40** Adsorption models of a TM-Urea molecule on Zn-(002, 100, 101) facets and the corresponding  $E_{\text{ads}}$ .

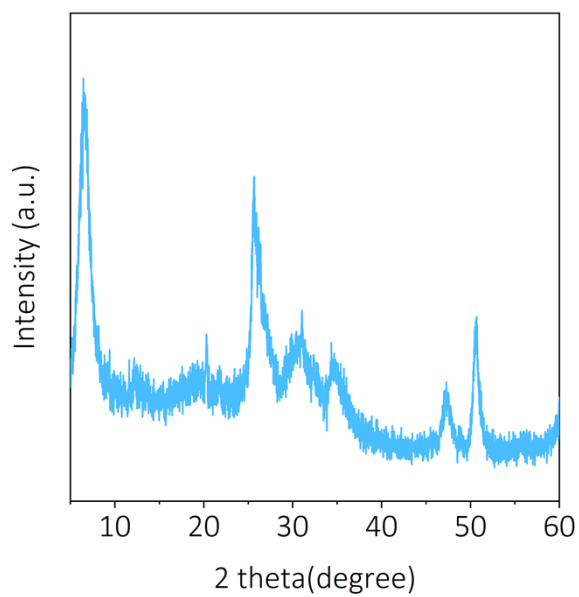

**Fig. S41** XRD pattern of the as-prepared VOH material.

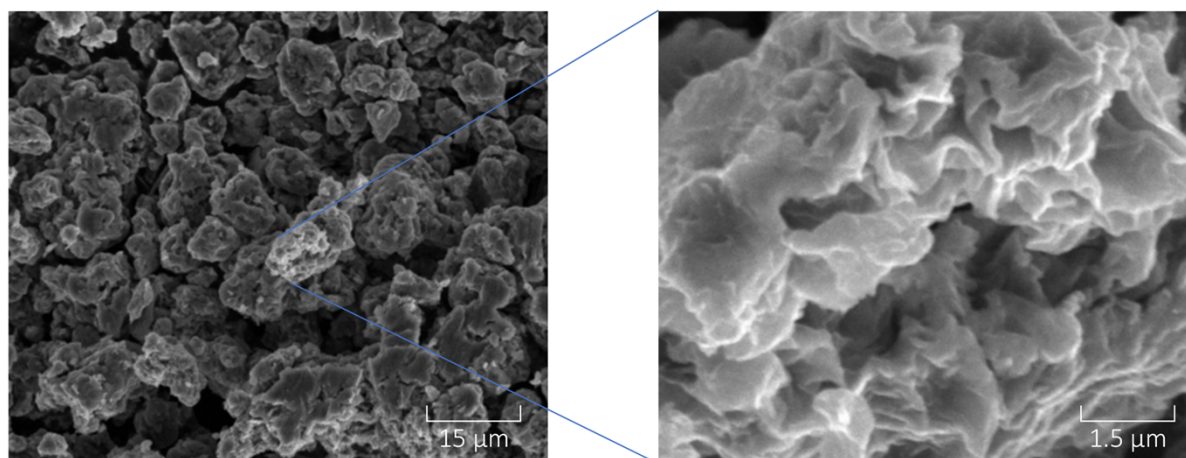

**Fig. S42** SEM images of the as-prepared VOH material.

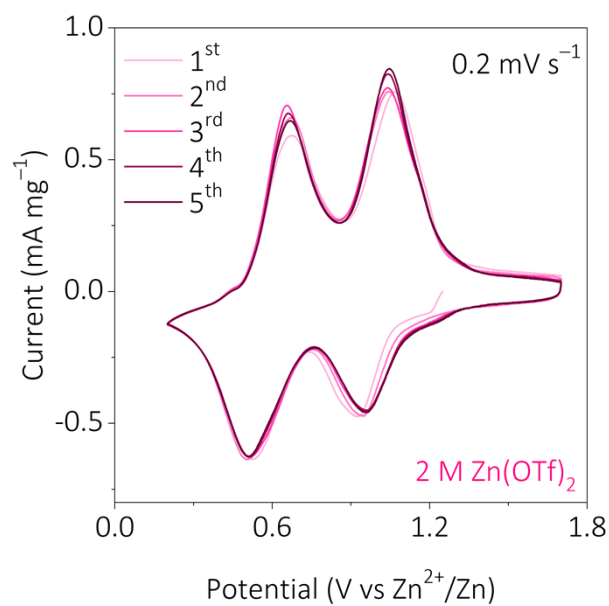

**Fig. S43** CV curves of full cells in the 2 M Zn(OTf)<sub>2</sub> electrolyte at a scan rate of 0.2 mV s<sup>-1</sup>.

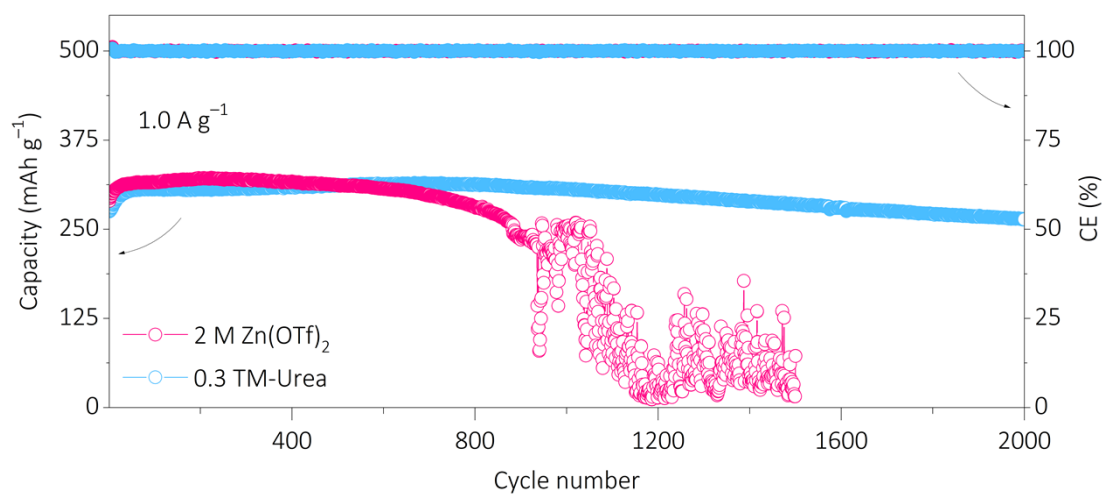

**Fig. S44** Long-term cycling stability of full cells in different electrolytes at  $1.0 \text{ A g}^{-1}$ .

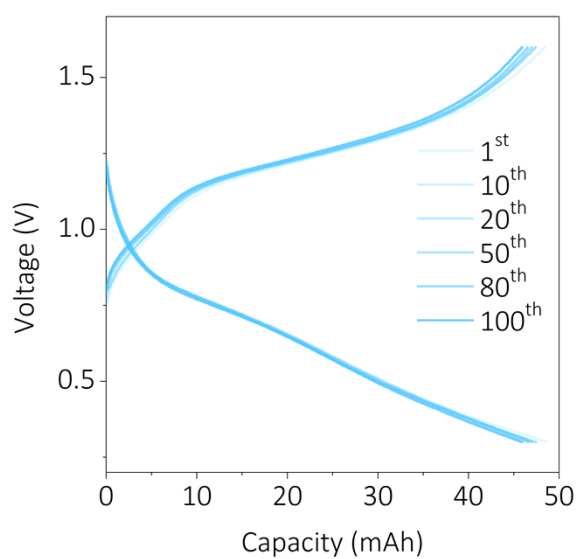

**Fig. S45** Typical charge/discharge curves of the pouch-type full cell in the 0.3 TM-Urea electrolyte at a testing current of 96 mA.

**Tab. S1** Electrolyte formulations and their abbreviations used in this work.

| Electrolytes             | Preparation details                                                                    | Molarity<br>(Zn(OTf) <sub>2</sub> + ureas) |
|--------------------------|----------------------------------------------------------------------------------------|--------------------------------------------|
| 2 M Zn(OTf) <sub>2</sub> | Adding 1.0397g of Zn(OTf) <sub>2</sub> into 1 mL of deionized water                    | 2 M + 0 M                                  |
| 0.1 TM-Urea              | Adding 0.1 mL of TM-Urea solvent (0.83 mmol) into 1 mL of the 2 M Zn(OTf) <sub>2</sub> | 1.82 M + 0.76 M                            |
| 0.3 TM-Urea              | Adding 0.3 mL of TM-Urea solvent (2.50 mmol) into 1 mL of the 2 M Zn(OTf) <sub>2</sub> | 1.54 M + 1.92 M                            |
| 0.5 TM-Urea              | Adding 0.5 mL of TM-Urea solvent (4.17 mmol) into 1 mL of the 2 M Zn(OTf) <sub>2</sub> | 1.33 M + 2.78 M                            |
| 0.3 Urea                 | Adding 2.50 mmol Urea powder into 1 mL of the 2 M Zn(OTf) <sub>2</sub>                 | 1.79 M + 2.23 M                            |
| 0.3 DM-Urea              | Adding 2.50 mmol DM-Urea powder into 1 mL of the 2 M Zn(OTf) <sub>2</sub>              | 1.67 M + 2.08 M                            |

**Tab. S2** pH values of 2 M Zn(OTf)<sub>2</sub> and 0.1–0.5 TM-Urea electrolytes at 25 °C.

| Electrolytes             | pH-1 | pH-2 | pH-3 | Avg. pH |
|--------------------------|------|------|------|---------|
| 2 M Zn(OTf) <sub>2</sub> | 3.50 | 3.51 | 3.52 | 3.51    |
| 0.1 TM-Urea              | 3.91 | 3.92 | 3.93 | 3.92    |
| 0.3 TM-Urea              | 4.10 | 4.14 | 4.16 | 4.13    |
| 0.5 TM-Urea              | 4.52 | 4.54 | 4.54 | 4.53    |

**Tab.S3** Cycling stability comparison of Zn||Zn symmetric cells between this work and the reported literature.

| Additives | Thickness<br>and theoretical<br>capacity | Electrolyte                                                                                                                                                  | Cumulative<br>capacity/<br>Current density<br>(Ah cm <sup>-2</sup> /mA<br>cm <sup>-2</sup> ) | DOD<br>(%)     | Ref.         |
|-----------|------------------------------------------|--------------------------------------------------------------------------------------------------------------------------------------------------------------|----------------------------------------------------------------------------------------------|----------------|--------------|
|           |                                          |                                                                                                                                                              | 21.75/5                                                                                      | 17.09          |              |
| TM-Urea   | 50 μm<br>~29.25 mAh                      | 0.3 TM-Urea                                                                                                                                                  | 35/10<br>8/20                                                                                | 34.19<br>68.38 | This<br>work |
| PMS       | 100 μm<br>~58.5 mAh                      | 2 M ZnSO <sub>4</sub> +<br>20 mM HSC <sub>3</sub> H <sub>6</sub> SO <sub>3</sub> Na                                                                          | 7/10                                                                                         | 17.09          | S12          |
| FF        | 25 μm<br>~14.625 mAh                     | 1 m Zn(TFSI) <sub>2</sub> + 0.5 m trifluoroethyl formate/DMSO-<br>H <sub>2</sub> O<br>(mass ratio: DMSO: H <sub>2</sub> O = 4: 1)                            | 3.8/2                                                                                        | 13.68          | S13          |
| EC        | 10 μm<br>~5.85 mAh                       | 2 M Zn(OTf) <sub>2</sub> /<br>EC-H <sub>2</sub> O<br>(volume ratio: EC: H <sub>2</sub> O = 5: 5)                                                             | 2/1                                                                                          | 17.09          | S14          |
| BHED      | 100 μm<br>~58.5 mAh                      | 2 M ZnSO <sub>4</sub> +<br>4 mM bis(2-hydroxyethyl) disulfide                                                                                                | 3/10                                                                                         | 25.5           | S15          |
| MA        | 60 μm<br>~35.1 mAh                       | 2 M ZnSO <sub>4</sub> + 5 wt.% maleic anhydride                                                                                                              | 2.7/10                                                                                       | 28.49          | S16          |
| NADS      | 250 μm<br>~146.25 mAh                    | 2 M ZnSO <sub>4</sub> -1.5 mM 2,6 naphthalenedisulfonic acid<br>disodium salt                                                                                | 15/30                                                                                        | 3.42           | S17          |
| TEGDME    | ~30 μm<br>~17.55 mAh                     | 1 m Zn(BF <sub>4</sub> ) <sub>2</sub> + 0.2 m Zn(CH <sub>3</sub> COO) <sub>2</sub> / TEGDME-H <sub>2</sub> O<br>(molar ratio: TEGDME: H <sub>2</sub> O=40:1) | 1.878/6.26                                                                                   | 20             | S18          |
| BHEG      | 100 μm<br>~58.5 mAh                      | 2 M ZnSO <sub>4</sub> + 0.5 M N,N-bis(2-hydroxyethyl)glycine                                                                                                 | 3/5                                                                                          | 8.5            | S19          |

| ARTICLE |                                  | Energy & Environmental Science                                                                      |         |       |     |
|---------|----------------------------------|-----------------------------------------------------------------------------------------------------|---------|-------|-----|
| ZSO-SAA | 80 $\mu\text{m}$<br>~46.8 mAh    | 2 M $\text{ZnSO}_4$ + 0.01 wt.% saponin+ 0.03 wt.% anisaldehyde                                     | 17/10   | 10.68 | S20 |
| PNO     | 100 $\mu\text{m}$<br>~58.5 mAh   | 2 M $\text{ZnSO}_4$ + 0.03 M pyridine nitrogen oxides                                               | 5/5     | 8.55  | S21 |
| DMSO    | 20 $\mu\text{m}$<br>~11.7 mAh    | 0.5 M $\text{Zn}(\text{BF}_4)_2 \cdot x\text{H}_2\text{O}$ -DMSO                                    | 0.6/1   | 60    | S22 |
| SL      | 50 $\mu\text{m}$<br>~29.25 mAh   | 1 m $\text{Zn}(\text{ClO}_4)_2/\text{SL-H}_2\text{O}$ (mass ratio: SL: $\text{H}_2\text{O}$ = 1: 4) | 1.3/1   | 3.42  | S23 |
| N-ac    | 100 $\mu\text{m}$<br>~58.5 mAh   | 2 M $\text{ZnSO}_4$ + 0.1 M N-Acetyl- $\epsilon$ -caprolactam                                       | 12/10   | 17.09 | S24 |
| CNF     | 100 $\mu\text{m}$<br>~58.5 mAh   | 3 M $\text{ZnSO}_4$ /trifluoroacetamide (CNF) (volume ratio: CNF: $\text{ZnSO}_4$ = 3: 7)           | 25/20   | 3.42  | S25 |
| q-GPA   | ~35 $\mu\text{m}$<br>~20.475 mAh | 1 M $\text{Zn}(\text{OTf})_2$ + 8 mg/mL quaternized galactomannan polysaccharide                    | 18.6/20 | 48.7  | S26 |

## Supplementary References

- [S1] H. Wang, X. Bi, Y. Bai, C. Wu, S. Gu, S. Chen, F. Wu, K. Amine and J. Lu, *Adv. Energy Mater.*, 2017, **7**, 1602720.
- [S2] A. Moretti, F. Maroni, I. Osada, F. Nobili and S. Passerini, *ChemElectroChem*, 2015, **2**, 529-537.
- [S3] H. J. Berendsen, D. van der Spoel and R. van Drunen, *Comp. Phys. Comm.*, 1995, **91**, 43-56.
- [S4] Y. Duan, C. Wu, S. Chowdhury, M. C. Lee, G. Xiong, W. Zhang, R. Yang, P. Cieplak, R. Luo and T. Lee, *J. Comput. Chem.*, 2003, **24**, 1999-2012.
- [S5] W. Humphrey, A. Dalke and K. Schulten, *J. Mol. Graph.*, 1996, **14**, 33-38.
- [S6] M. J. Frisch, G. W. Trucks, H. B. Schlegel, G. E. Scuseria, M. A. Robb, J. R. Cheeseman, G. Scalmani, V. Barone, G. A. Petersson, H. Nakatsuji, X. Li, M. Caricato, A. V. Marenich, J. Bloino, B. G. Janesko, R. Gomperts, B. Mennucci, H. P. Hratchian, J. V. Ortiz, A. F. Izmaylov, J. L. Sonnenberg, D. Williams-Young, F. Ding, F. Lipparini, F. Egidi, J. Goings, B. Peng, A. Petrone, T. Henderson, D. Ranasinghe, V. G. Zakrzewski, J. Gao, N. Rega, G. Zheng, W. Liang, M. Hada, M. Ehara, K. Toyota, R. Fukuda, J. Hasegawa, M. Ishida, T. Nakajima, Y. Honda, O. Kitao, H. Nakai, T. Vreven, K. Throssell, J. A. Montgomery, Jr., J. E. Peralta, F. Ogliaro, M. J. Bearpark, J. J. Heyd, E. N. Brothers, K. N. Kudin, V. N. Staroverov, T. A. Keith, R. Kobayashi, J. Normand, K. Raghavachari, A. P. Rendell, J. C. Burant, S. S. Iyengar, J. Tomasi, M. Cossi, J. M. Millam, M. Klene, C. Adamo, R. Cammi, J. W. Ochterski, R. L. Martin, K. Morokuma, O. Farkas, J. B. Foresman and D. J. Fox, *Gaussian 16, Revision B.01*, Gaussian, Inc., Wallingford, CT, 2019.
- [S7] G. Kresse and J. Furthmüller, *Phys. Rev. B*, 1996, **54**, 11169.
- [S8] G. Kresse and D. Joubert, *Phys. Rev. B*, 1999, **59**, 1758.
- [S9] J. P. Perdew, K. Burke and M. Ernzerhof, *Phys. Rev. Lett.*, 1996, **77**, 3865.
- [S10] K. Qiu, G. Ma, Y. Wang, M. Liu, M. Zhang, X. Li, X. Qu, W. Yuan, X. Nie and N. Zhang, *Adv. Funct. Mater.*, 2024, **34**, 2313358.
- [S11] G. Ma, W. Yuan, X. Li, T. Bi, L. Niu, Y. Wang, M. Liu, Y. Wang, Z. Shen and N. Zhang, *Adv. Mater.*, 2024, **36**, 2408287.
- [S12] Y. Song, M. Chen, Z. Zhong, Z. Liu, S. Liang and G. Fang, *Nat. Commun.*, 2025, **16**, 3142.
- [S13] J. Heo, D. Dong, Z. Wang, F. Chen and C. Wang, *Joule*, 2025, **9**, 101844.
- [S14] J. Cong, Y. Wang, X. Lin, Z. Huang, H. Wang, J. Li, L. Hu, H. Hua, J. Huang and Y.-C. Lin, *J. Am. Chem. Soc.*, 2025, **147**, 8607-8617.
- [S15] S. Han, M. Li, Q. Fan, Z. Han, X. Ming, W. Wang, W. Cai and H. Niu, *Energy Environ. Sci.*, 2025, **18**, 4186-4199.
- [S16] Y. Li, L. Liu, H. Zhang, H. Wang, Z. Sun, Z. Zhang, W. Pang, S. Omanovic, S. Sun and X. Chen, *Adv. Funct. Mater.*, 2025, **35**, 2410855.
- [S17] H. Lin, L. Zeng, C. Lin, J. Wu, H. He, C. Huang, W. Lai, P. Xiong, F. Xiao and Q. Qian, *Energy Environ. Sci.*, 2025, **18**, 1282-1293.

- [S18] K. Guan, W. Chen, Y. Yang, F. Ye, Y. Hong, J. Zhang, Q. Gu, Y. Wu and L. Hu, *Adv. Mater.*, 2024, **36**, 2405889.
- [S19] J. Bu, P. Liu, G. Ou, M. Ye, Z. Wen, Y. Zhang, Y. Tang, X. Liu and C. C. Li, *Adv. Mater.*, 2025, **37**, 2420221.
- [S20] K. Liu, M. Sun, Y. Wu, T. Zhang, A. Zhu, S. Bu, C. Luan, K. Liu, Y. Zhou and D. Lin, *Adv. Mater.*, 2025, **37**, 2420079.
- [S21] Q. Kang, H. Liang, Z. Zhu, F. Xing, B. Zhu, Y. Li, S. Wang, S. Tang, H. Li and L. Pan, *Angew. Chem. Int. Ed.*, 2025, **64**, e202420183.
- [S22] H. Ren, S. Li, L. Xu, L. Wang, X. Liu, L. Wang, Y. Liu, L. Zhang, H. Zhang and Y. Gong, *Angew. Chem. Int. Ed.*, 2025, **137**, e202423302.
- [S23] Z. Peng, L. Tang, S. Li, L. Tan and Y. Chen, *Angew. Chem. Int. Ed.*, 2025, **64**, e202418242.
- [S24] D. Xu, X. Ren, H. Li, Y. Zhou, S. Chai, Y. Chen, H. Li, L. Bai, Z. Chang and A. Pan, *Angew. Chem. Int. Ed.*, 2024, **136**, e202402833.
- [S25] S. Li, X. Chen, J. Zhao, Y. Zhang, K. Zhang, K. Wang, J. Shen, P. Lv, Y. Jia and Y. Bai, *ACS Energy Lett.*, 2025, **10**, 1642-1653.
- [S26] B. Hu, T. Chen, Y. Wang, X. Qian, Q. Zhang and J. Fu, *Adv. Energy Mater.*, 2024, **14**, 2401
